# Supplementary material for: Coverage-sensitive mechanism of electrochemical NO reduction on the SrTiO3(001) surface: a DFT investigation
Source: Royal Society of Chemistry journal article supplement (doi:10.1039/d4cp01076k), 2024-01-01
Supplement: d4cp01076k1.pdf [file d4cp01076k1.pdf]

## Supporting Information

### Coverage-sensitive mechanism of electrochemical NO reduction on SrTiO<sub>3</sub>(001) surface: A DFT investigation

*Xiangyu Zhang,<sup>[a]</sup> Lu Liu,<sup>[a]</sup> Yuncai Zhao,<sup>[a]</sup> Yijing Gao,<sup>\*[a,b]</sup> Deli Chen, and Weidong  
Zhu<sup>\*[a, b]</sup>*

- a. Key Laboratory of the Ministry of Education for Advanced Catalysis Materials,  
Institute of Physical Chemistry, Zhejiang Normal University, 321004 Jinhua, P.  
R. of China
  
- b. Zhejiang Engineering Laboratory for Green Syntheses and Applications of  
Fluorine-Containing Specialty Chemicals, Institute of Advanced Fluorine-  
Containing Materials, Zhejiang Normal University, 321004 Jinhua, P. R. of  
China

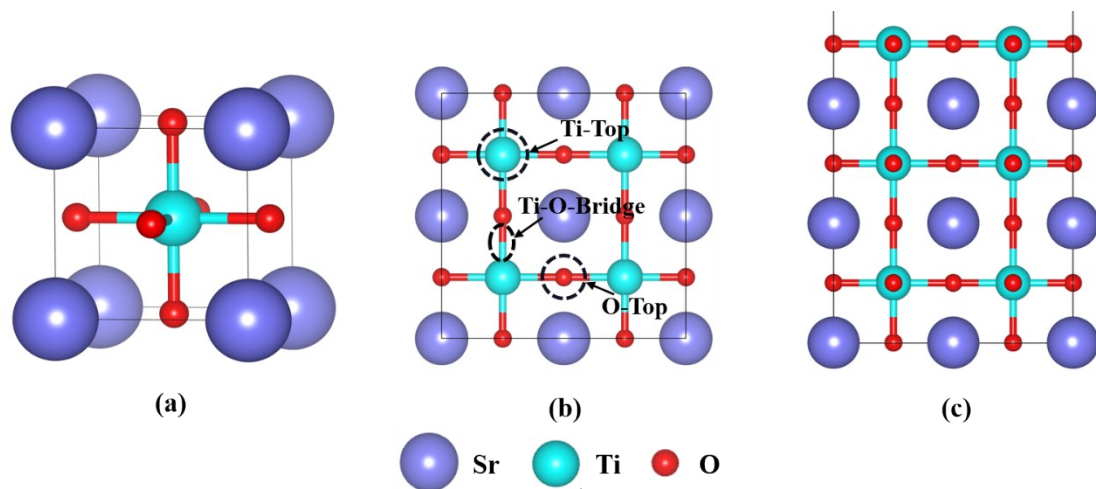

**Fig. S1** Primitive cell of the chalcogenide SrTiO<sub>3</sub> (a). Top (b) and side view (c) of SrTiO<sub>3</sub> (001) surface.

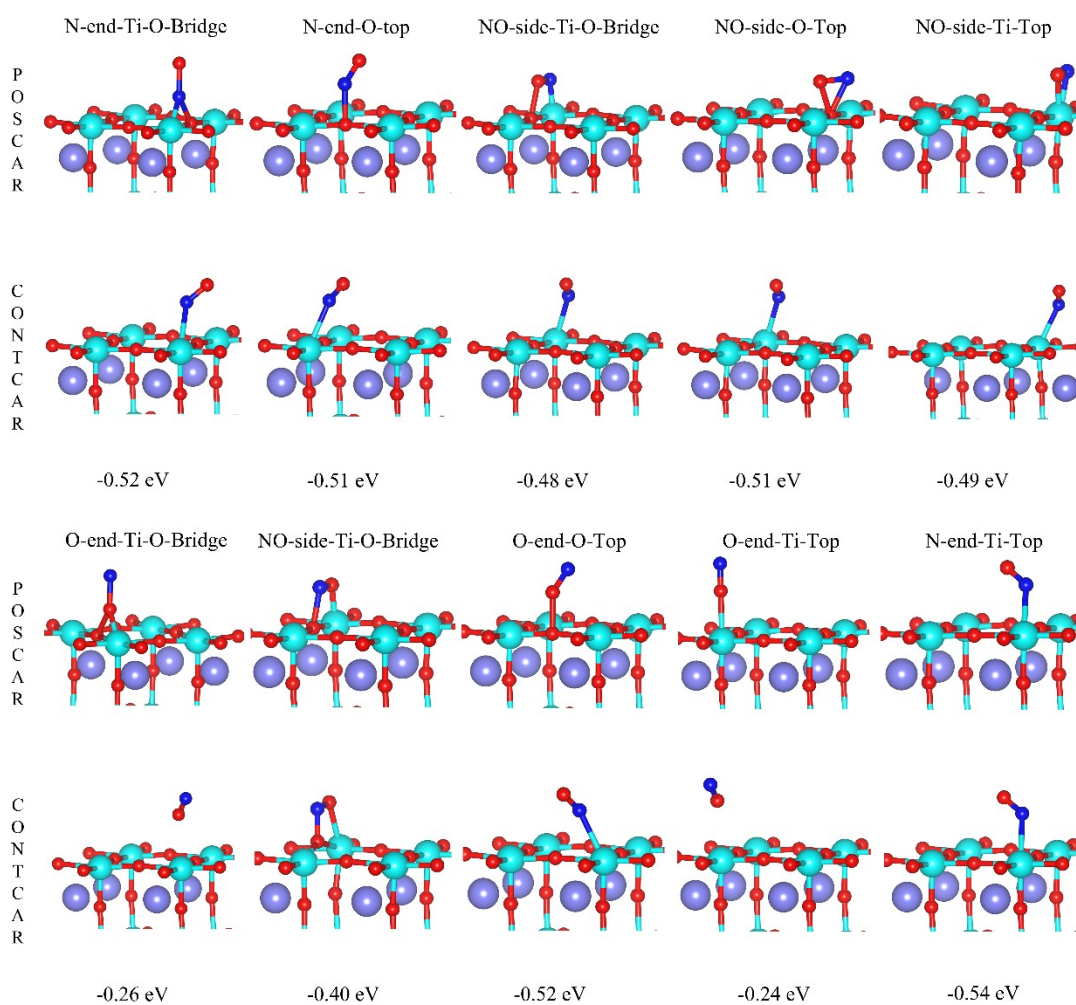

**Fig. S2** NO adsorption structures and corresponding energies on SrTiO<sub>3</sub>(001) at 0.25 ML.

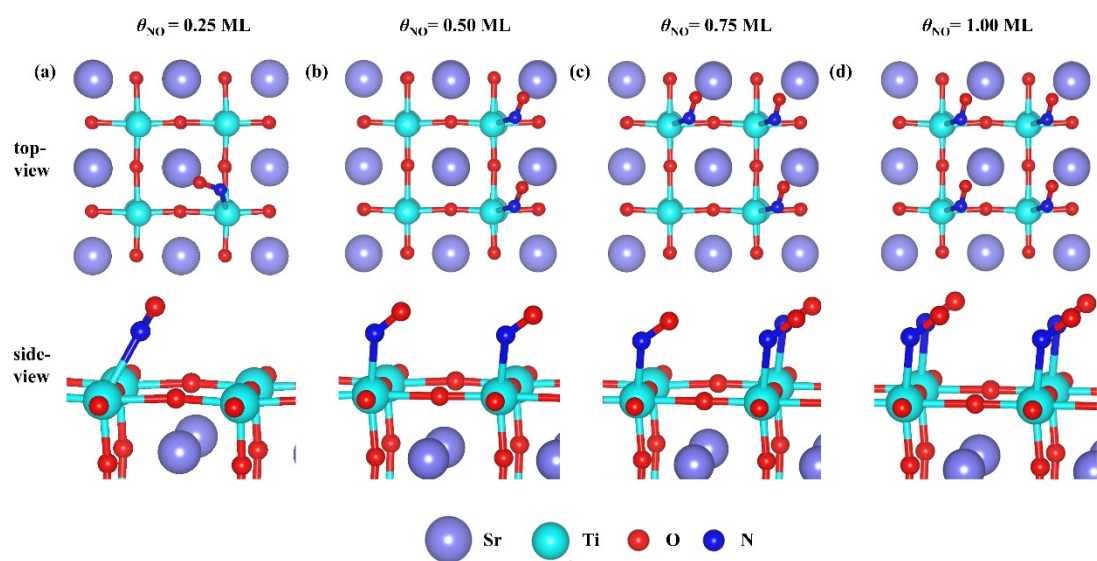

**Fig. S3** Top and side views of the optimal NO adsorption structures at  $\theta_{\text{NO}} = 0.25 \text{ ML}$  (a),  $0.50 \text{ ML}$  (b),  $0.75 \text{ ML}$  (c), and  $1.00 \text{ ML}$  (d), respectively.

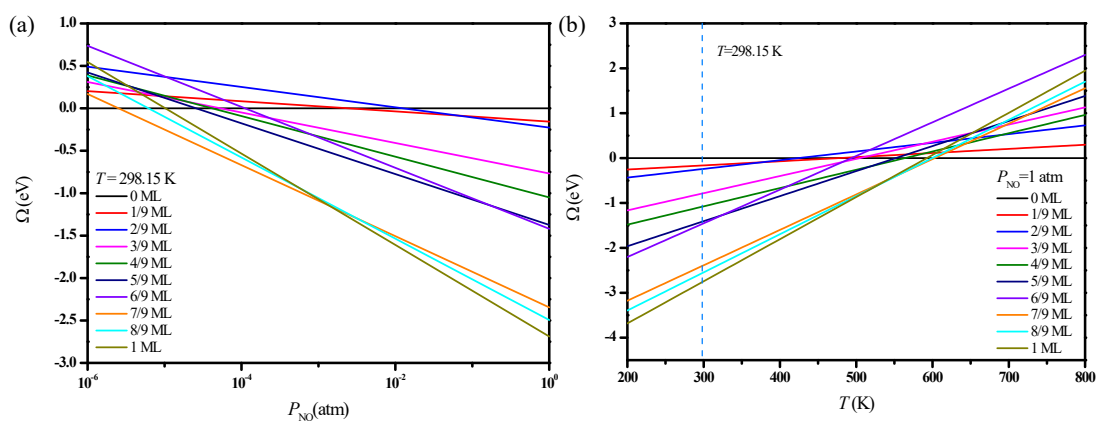

**Fig. S4** Phase diagram for NO adsorption on the  $3 \times 3$  SrTiO<sub>3</sub> (001) surface as a function of NO pressure at 298.15 K (a) and of temperature at a NO pressure of 1 atm (b).

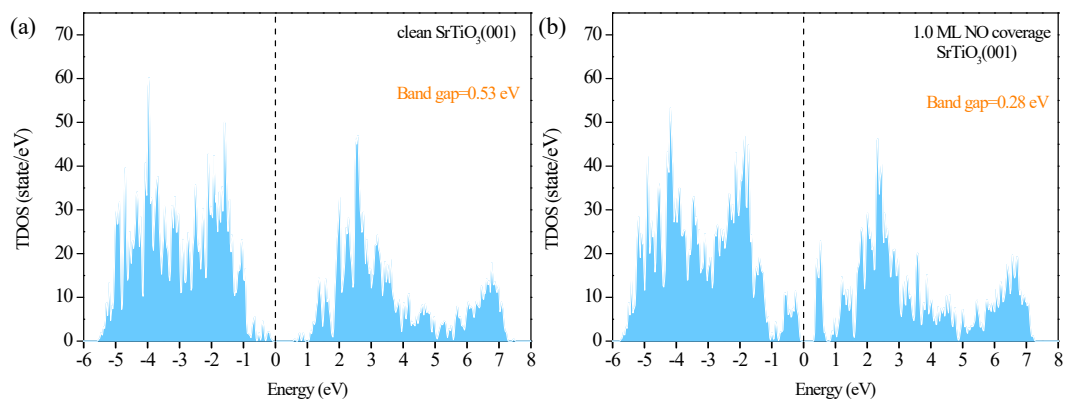

**Fig. S5** Total density of states for clean SrTiO<sub>3</sub>(0 0 1) surface (a) and 1.00 ML NO coverage (b), with the dashed line indicating the Fermi energy level. The corresponding band gap value is presented in each panel.

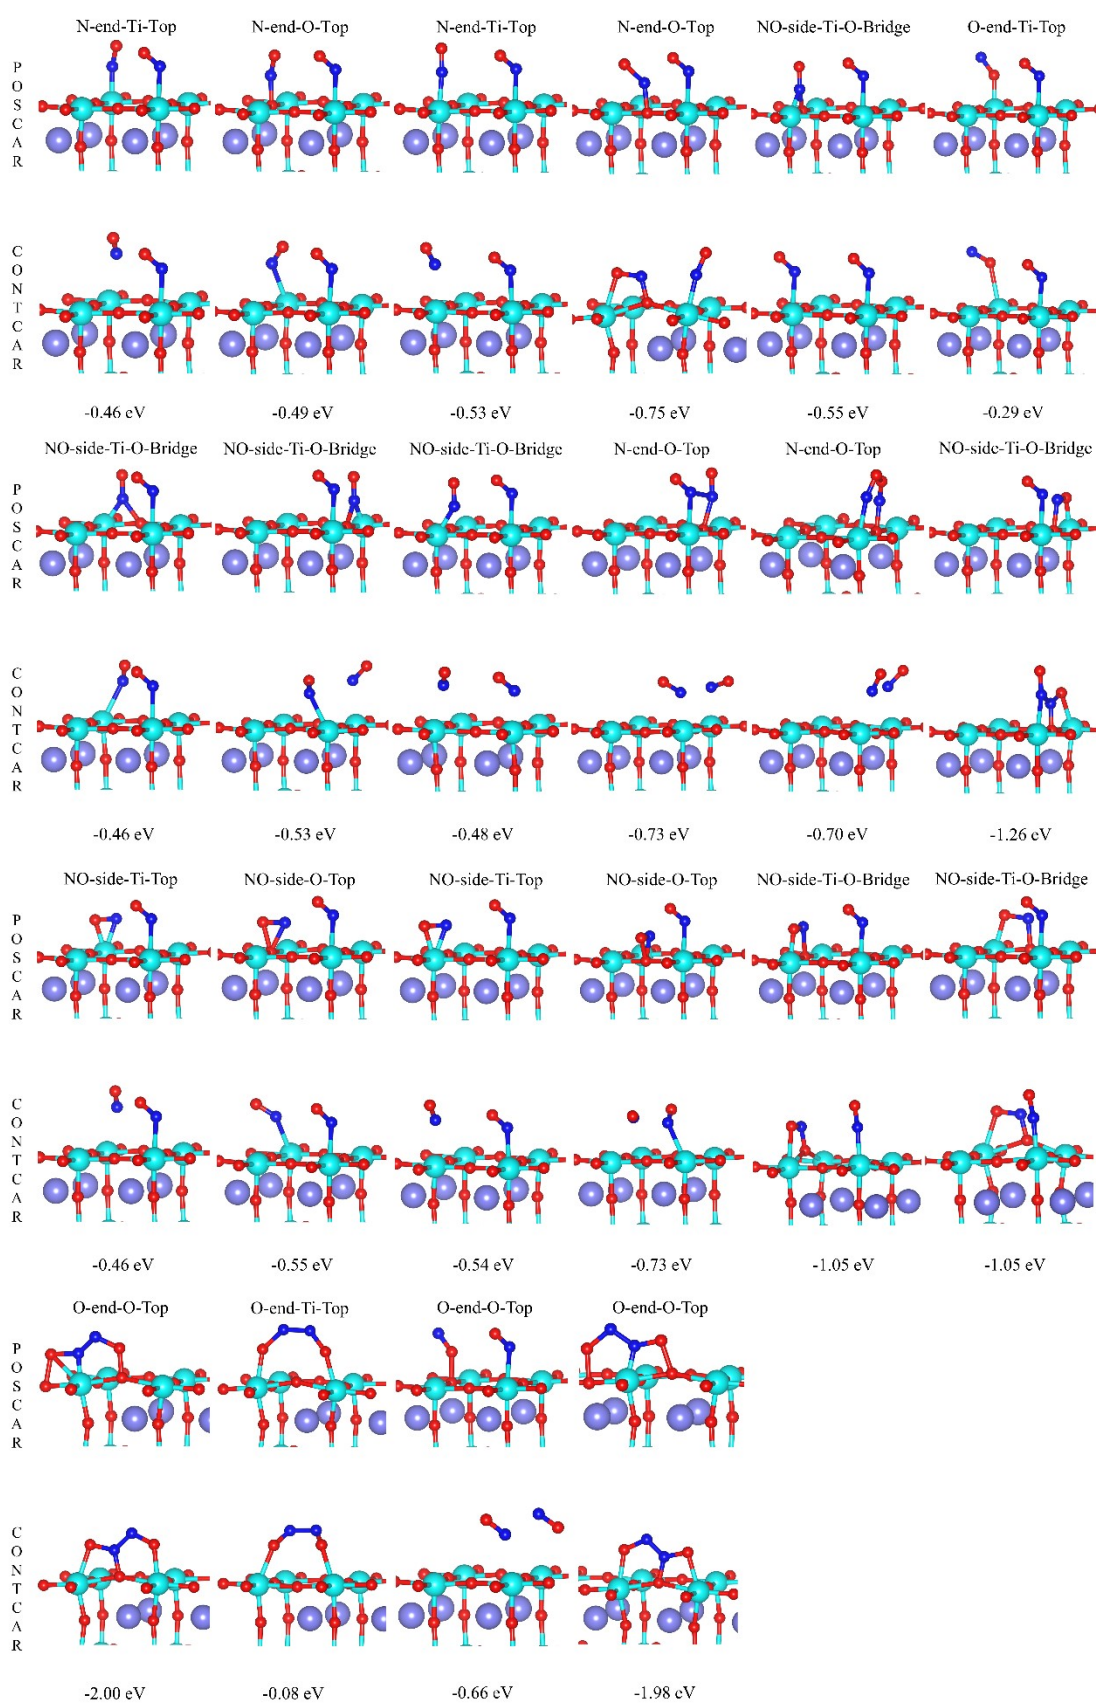

**Fig. S6** NO adsorption structures and corresponding energies on SrTiO<sub>3</sub>(001) at 0.50 ML.

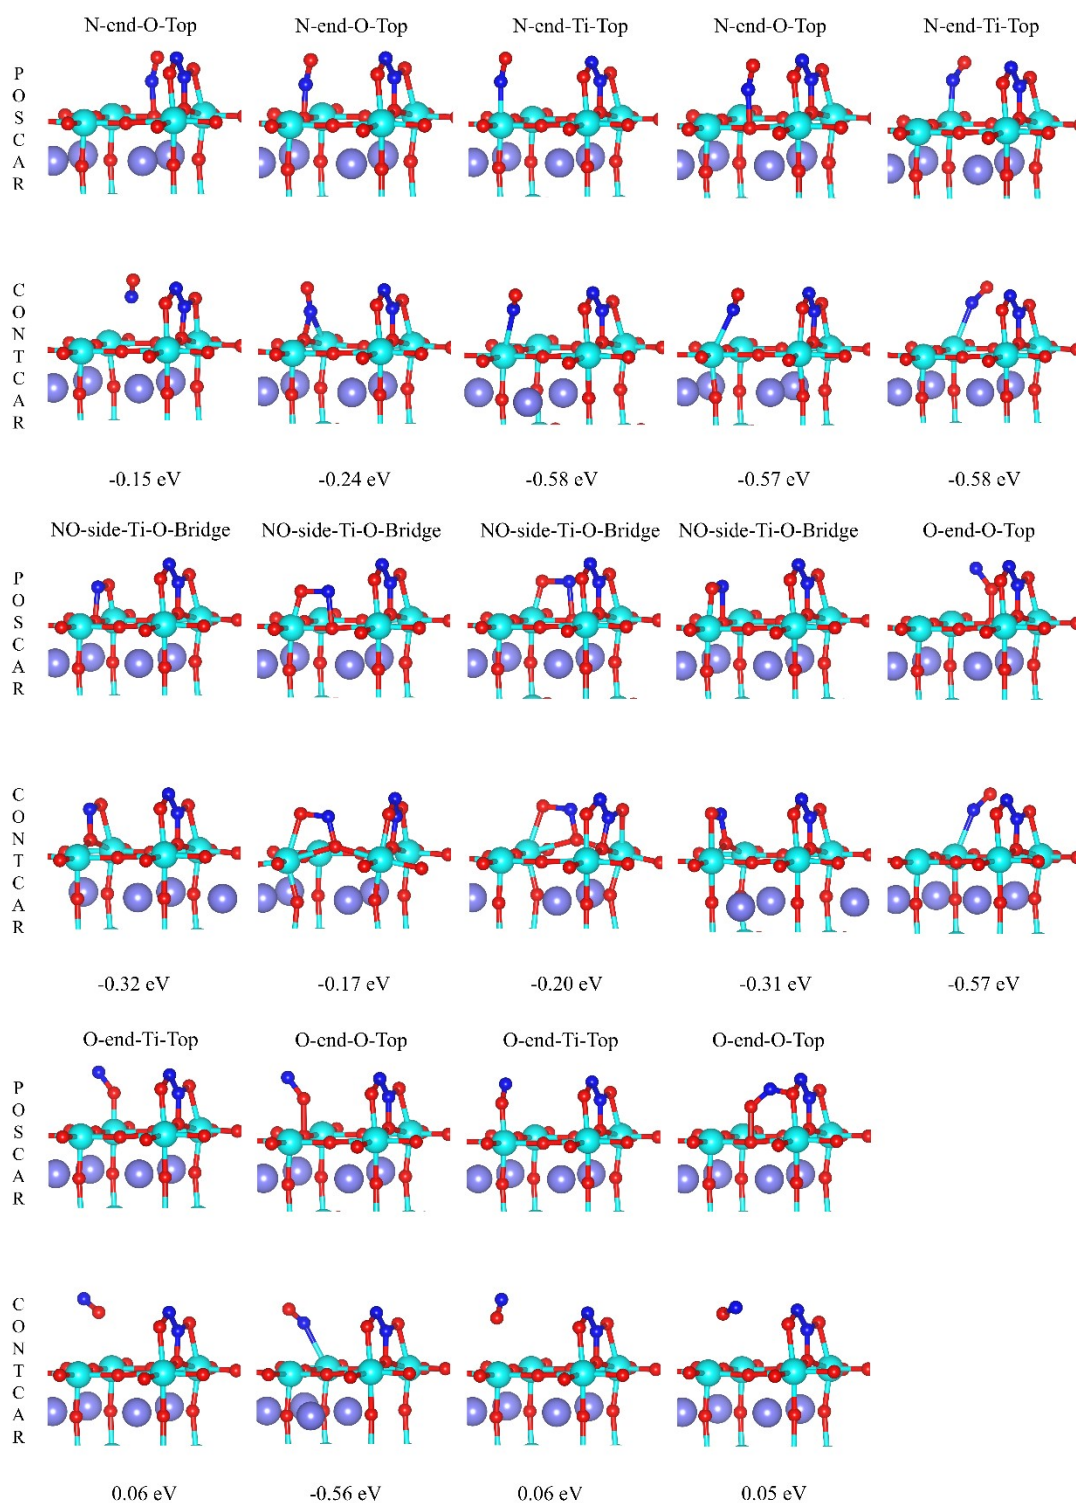

**Fig. S7** NO adsorption structures and corresponding energies on SrTiO<sub>3</sub>(001) at 0.75 ML.

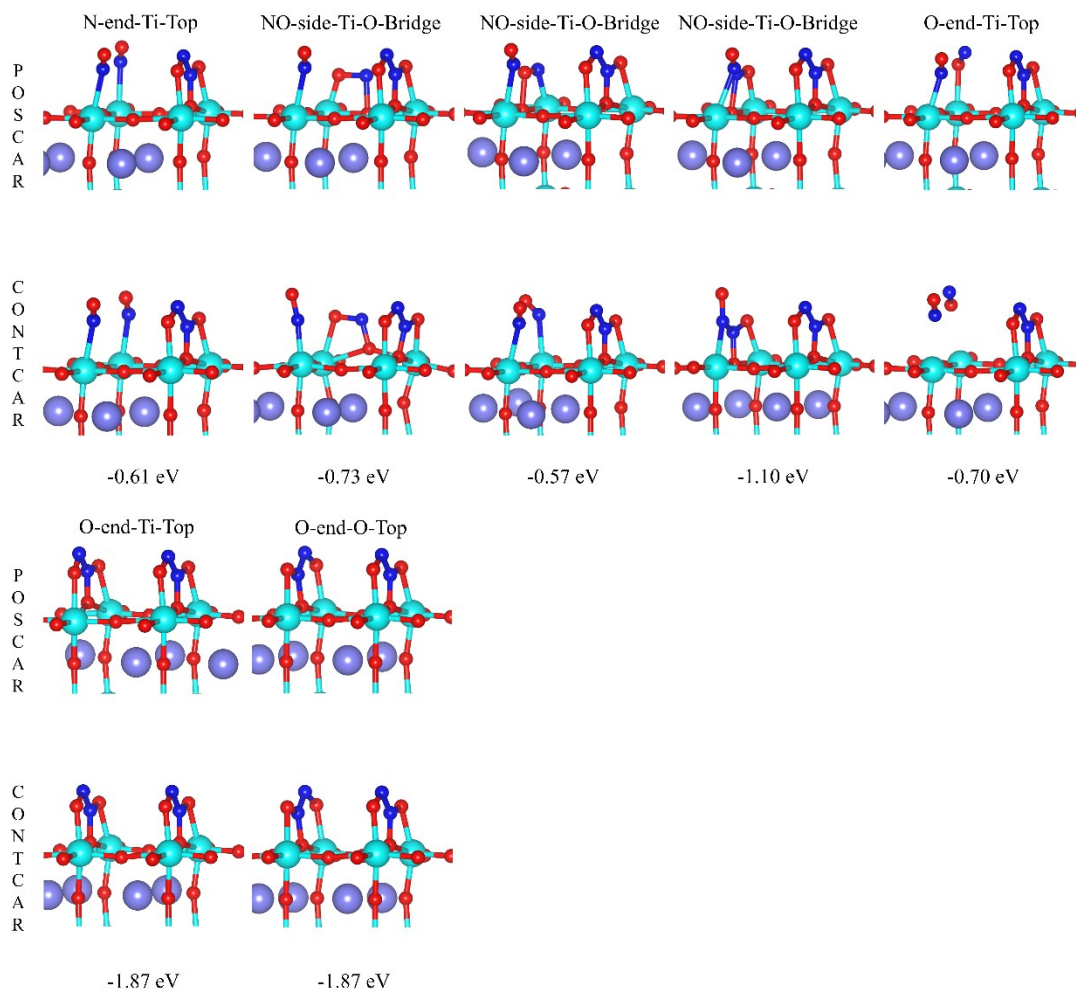

**Fig. S8** NO adsorption structures and corresponding energies on SrTiO<sub>3</sub>(001) at 1.00 ML.

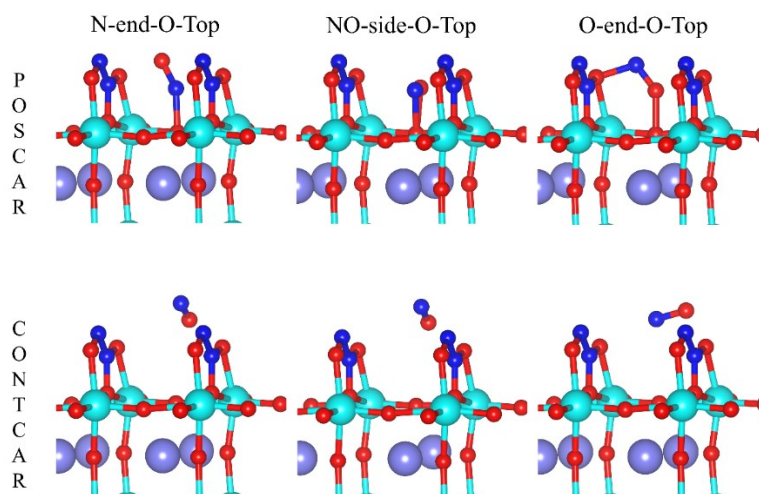

**Fig. S9** Structures of five NO molecules adsorbed on SrTiO<sub>3</sub>(001).



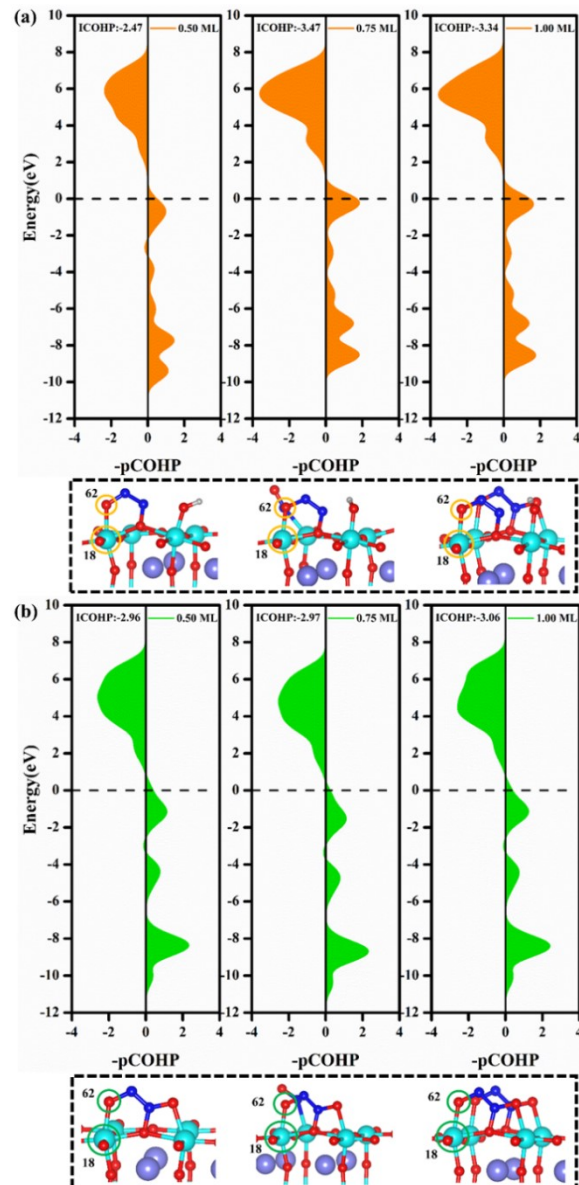

**Fig. S10** COHP of the O-62 of the adsorbed intermediate  $*(NO)_2$  and the active center Ti-18 (a) and of the adsorbed intermediate  $*ONN+*OH$  and the active center Ti-18 (b).

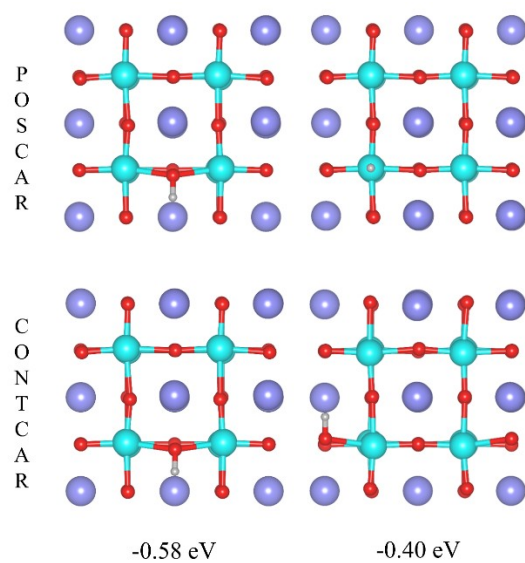

**Fig. S11** Structures and corresponding energies of H adsorption on SrTiO<sub>3</sub>(001) at 0 ML.

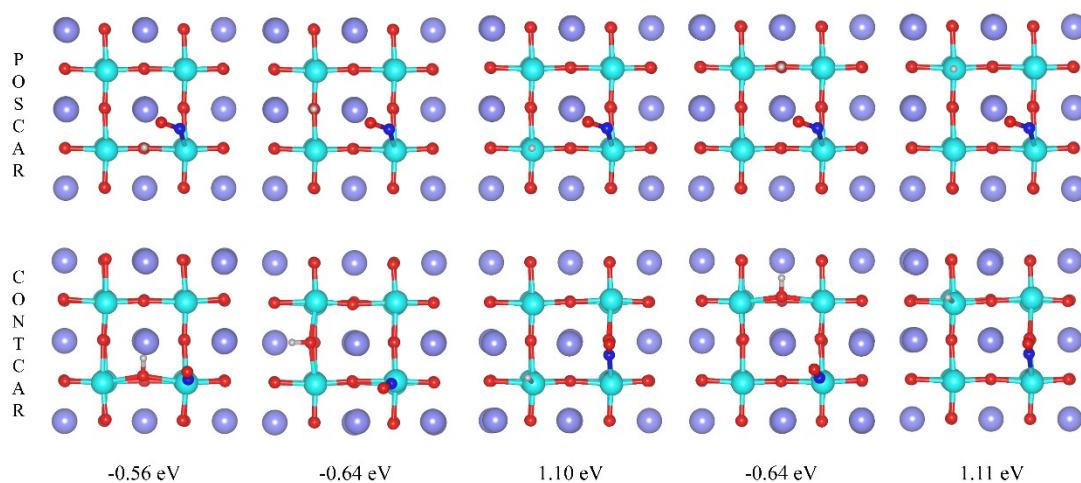

**Fig. S12** Structures and corresponding energies of H adsorption on SrTiO<sub>3</sub>(001) at 0.25 ML.

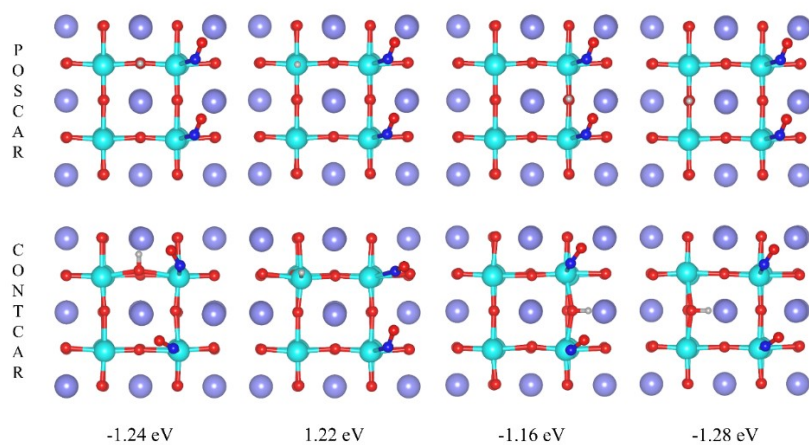

**Fig. S13** Structures and corresponding energies of H adsorption on SrTiO<sub>3</sub>(001) at 0.50 ML.

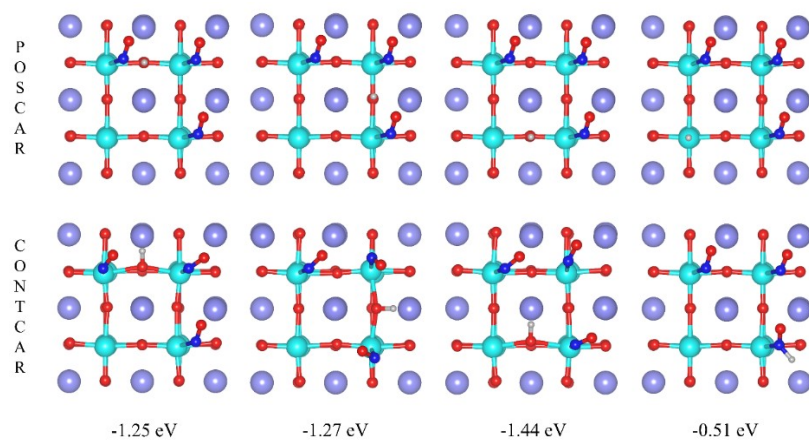

**Fig. S14** Structures and corresponding energies of H adsorption on SrTiO<sub>3</sub>(001) at 0.75 ML.
